# Supplementary material
Source: PubMed Central journal article supplement (PMC6195833)

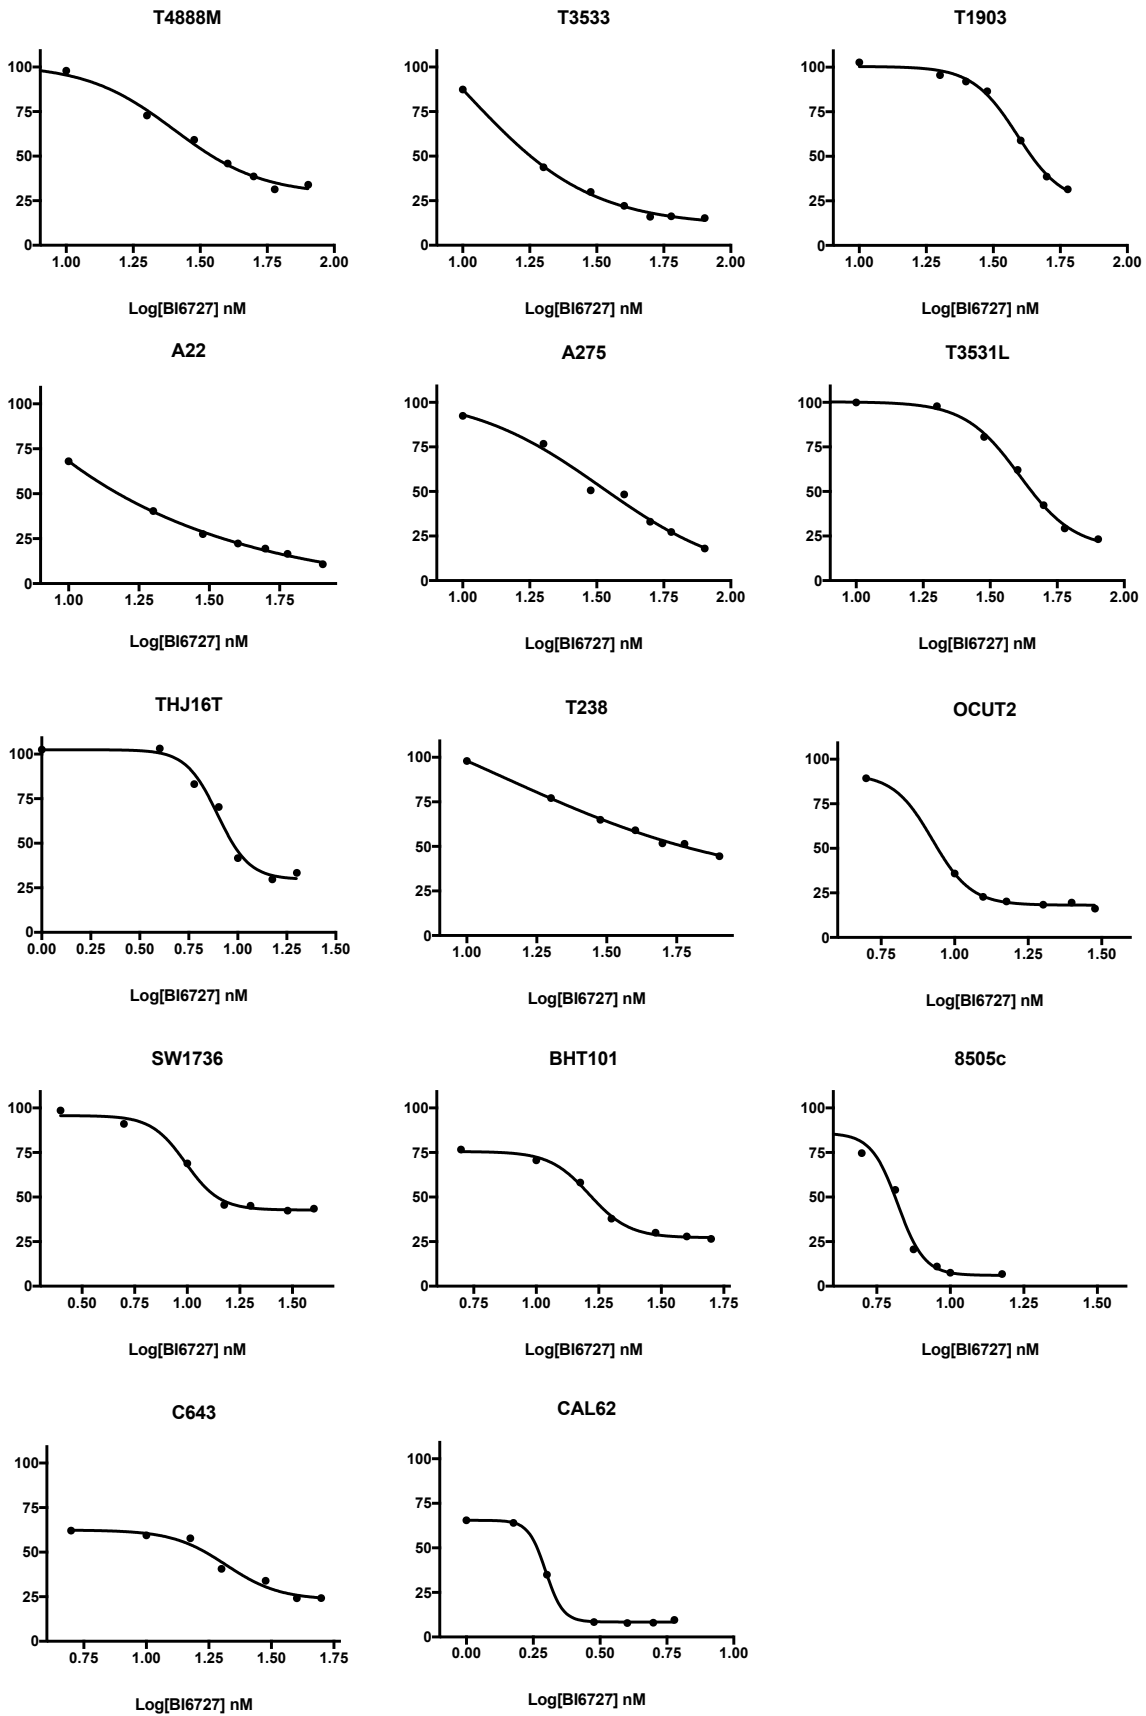

Suppl. Fig. 1

Supplement: NIHMS1507602-supplement-1.pdf [file NIHMS1507602-supplement-1.pdf]

# T4888M

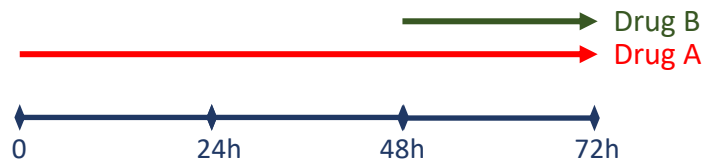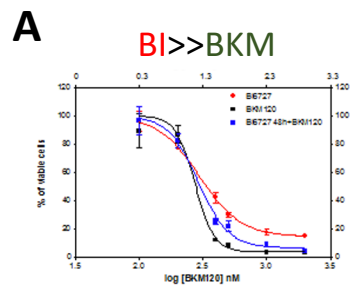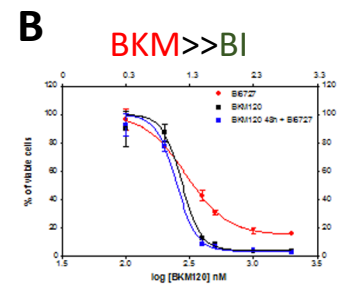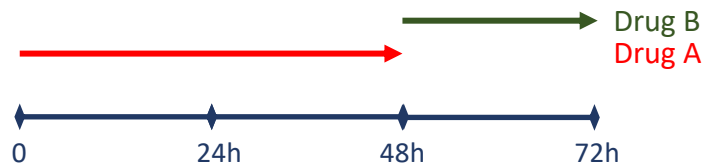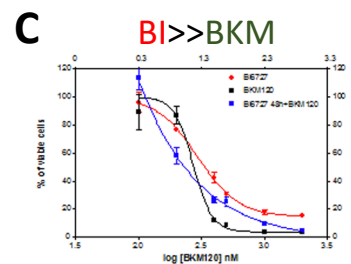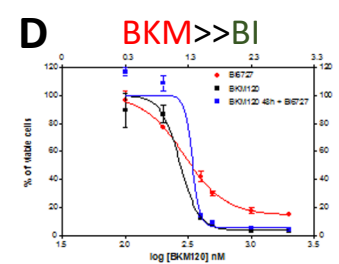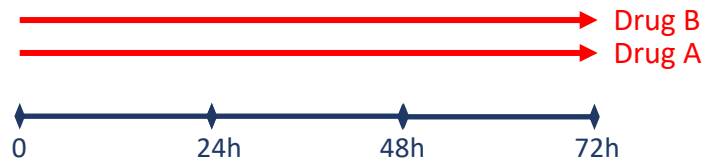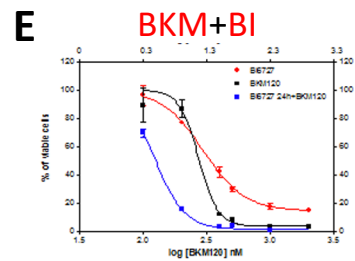

Supplement: NIHMS1507602-supplement-2.pdf [file NIHMS1507602-supplement-2.pdf]
